# Supplementary material
Source: PubMed Central journal article supplement (PMC2575471)
Supplement: 0805870105_0805870105SI.pdf [file 0805870105_0805870105SI.pdf]

# Supporting Information

Kondoh 10.1073/pnas.0805870105

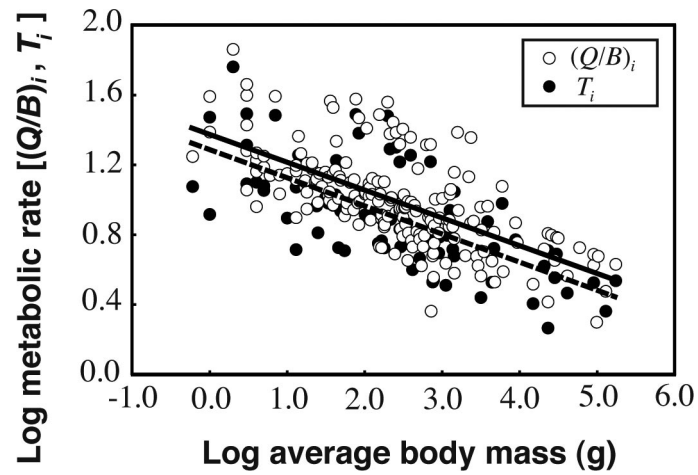

**Fig. S1.** Bioenergetic-allometric relationships in the Caribbean food web. The relationship between the annual food-consumption per unit biomass [(Q/B)<sub>i</sub>] and average body mass (linear regression:  $b = -0.159 \pm 0.013$ ,  $t_{194} = -12.5$ ,  $P < 0.001$ ) and the relationship between mass-specific respiration rate ( $T_i$ ) and average body mass ( $b = -0.161 \pm 0.019$ ,  $t_{80} = -8.36$ ,  $P < 0.001$ ).
